# Supplementary material for: Safety, tolerability and efficacy of intra-articular Progenza in knee osteoarthritis: a randomized double-blind placebo-controlled single ascending dose study
Source: J Transl Med. 2018 Mar 6;16:49. doi: 10.1186/s12967-018-1420-z (PMC5840781; doi:10.1186/s12967-018-1420-z)
Supplement: Supplementary file 1 — Additional file 1: Table S1. Baseline distribution of semi-quantitative MRI OA Knee Score (MOAKS) markers. Table S2. Number of patients noted with changes from screening to month 12 for MOAKS assessments. [file 12967_2018_1420_MOESM1_ESM.pdf]

---

## **Additional File**

**Safety, tolerability and efficacy of intra-articular Progenza in knee osteoarthritis: A randomized double-blind placebo-controlled single ascending dose study**

**Additional Table S1**

Baseline distribution of semi-quantitative MRI OA Knee Score (MOAKS) markers.

|                                                                 | Placebo (n=4) | PRG 3.9M (n=8) | PRG 6.7M (n=8) |
|-----------------------------------------------------------------|---------------|----------------|----------------|
| <b>Cartilage morphology</b>                                     |               |                |                |
| Maximum thickness score across entire knee                      |               |                |                |
| 0                                                               | 1 (25%)       | 0 (0%)         | 0 (0%)         |
| 1                                                               | 0 (0%)        | 1 (12.5%)      | 0 (0%)         |
| 2                                                               | 1 (25%)       | 3 (37.5%)      | 3 (37.5%)      |
| 3                                                               | 2 (50%)       | 4 (50%)        | 5 (62.5%)      |
| No. of subregions with thickness score >0 across entire knee    |               |                |                |
| 0                                                               | 1 (25%)       | 0 (0%)         | 0 (0%)         |
| 1-3                                                             | 1 (25%)       | 2 (25%)        | 3 (37.5%)      |
| 4-6                                                             | 1 (25%)       | 4 (50%)        | 3 (37.5%)      |
| 7-9                                                             | 1 (25%)       | 2 (25%)        | 2 (25%)        |
| Maximum surface area score across entire knee                   |               |                |                |
| 0-1                                                             | 1 (25%)       | 0 (0%)         | 0 (0%)         |
| 2                                                               | 0 (0%)        | 2 (25%)        | 2 (25%)        |
| 3                                                               | 3 (75%)       | 6 (75%)        | 6 (75%)        |
| No. of subregions with surface area score >0 across entire knee |               |                |                |
| 0-1                                                             | 1 (25%)       | 0 (0%)         | 0 (0%)         |
| 2-4                                                             | 0 (0%)        | 1 (12.5%)      | 1 (12.5%)      |
| 5-7                                                             | 0 (0%)        | 2 (25%)        | 4 (50%)        |
| 8+                                                              | 3 (75%)       | 5 (62.5%)      | 3 (37.5%)      |
| <b>Osteophytes</b>                                              |               |                |                |
| No. of locations affected by any osteophyte                     |               |                |                |
| 0-2                                                             | 1 (25%)       | 1 (12.5%)      | 0 (0%)         |
| 3-5                                                             | 0 (0%)        | 0 (0%)         | 1 (12.5%)      |
| 6+                                                              | 3 (75%)       | 7 (87.5%)      | 7 (87.5%)      |
| Maximum osteophyte score in knee                                |               |                |                |
| 0-1                                                             | 1 (25%)       | 1 (12.5%)      | 0 (0%)         |
| 2                                                               | 1 (25%)       | 3 (37.5%)      | 6 (75%)        |
| 3                                                               | 2 (50%)       | 4 (50%)        | 2 (25%)        |
| <b>Meniscus morphology</b>                                      |               |                |                |
| Maximum grade across all locations                              |               |                |                |
| 0 (normal/signal)                                               | 1 (25%)       | 0 (0%)         | 0 (0%)         |
| 1 (tear)                                                        | 0 (0%)        | 3 (37.5%)      | 3 (37.5%)      |
| 2 (maceration)                                                  | 3 (75%)       | 5 (62.5%)      | 5 (62.5%)      |
| <b>BMLs</b>                                                     |               |                |                |
| No. of subregions affected by any BML                           |               |                |                |
| 0                                                               | 1 (25%)       | 0 (0%)         | 0 (0%)         |
| 1                                                               | 0 (0%)        | 2 (25%)        | 0 (0%)         |
| 2                                                               | 0 (0%)        | 0 (0%)         | 0 (0%)         |
| 3                                                               | 1 (25%)       | 1 (12.5%)      | 2 (25%)        |
| 4                                                               | 0 (0%)        | 3 (37.5%)      | 1 (12.5%)      |
| 5+                                                              | 2 (50%)       | 2 (25%)        | 5 (62.5%)      |
| Maximum BML score in knee                                       |               |                |                |
| 0                                                               | 1 (25%)       | 0 (0%)         | 0 (0%)         |
| 1                                                               | 0 (0%)        | 1 (12.5%)      | 0 (0%)         |
| 2                                                               | 1 (25%)       | 5 (62.5%)      | 4 (50%)        |
| 3                                                               | 2 (50%)       | 2 (25%)        | 4 (50%)        |
| <b>Synovitis (Hoffa-synovitis score)</b>                        |               |                |                |
| 0                                                               | 0 (0%)        | 0 (0%)         | 0 (0%)         |
| 1                                                               | 2 (50%)       | 5 (62.5%)      | 3 (37.5%)      |
| 2-3                                                             | 2 (50%)       | 3 (37.5%)      | 5 (62.5%)      |
| <b>Effusions (effusion-synovitis score)</b>                     |               |                |                |
| 0-1                                                             | 2 (50%)       | 1 (12.5%)      | 3 (37.5%)      |
| 2-3                                                             | 2 (50%)       | 7 (87.5%)      | 5 (62.5%)      |

Data are presented as n (%). BML, bone marrow lesion.

---

**Additional Table S2**

Number of patients noted with changes from screening to Month 12 for MOAKS assessments.

| <b>Treatment group</b> | <b>MOAKS derived measure</b>                               | <b>Improved</b> | <b>Unchanged</b> | <b>Deteriorated</b> |
|------------------------|------------------------------------------------------------|-----------------|------------------|---------------------|
| <b>Placebo</b>         | Number of sub-regions with cartilage thickness score >0    | 0 (0%)          | 3 (75%)          | 1 (25%)             |
|                        | Maximum BML score in knee                                  | 0 (0%)          | 3 (75%)          | 1 (25%)             |
|                        | Number of sub-regions affected by BMLs                     | 2 (50%)         | 2 (50%)          | 0 (0%)              |
|                        | Hoffa-synovitis score                                      | 1 (25%)         | 3 (75%)          | 0 (0%)              |
|                        | Effusion-synovitis score                                   | 2 (50%)         | 2 (50%)          | 0 (0%)              |
| <b>PRG 3.9M</b>        | Maximum cartilage thickness score across treated knee      | 0 (0%)          | 6 (86%)          | 1 (14%)             |
|                        | Number of sub-regions with cartilage surface area score >0 | 0 (0%)          | 6 (86%)          | 1 (14%)             |
|                        | Number of locations affected by osteophytes                | 0 (0%)          | 6 (86%)          | 1 (14%)             |
|                        | Maximum BML score in knee                                  | 0 (0%)          | 5 (71%)          | 2 (29%)             |
|                        | Number of sub-regions affected by BMLs                     | 1 (14%)         | 4 (57%)          | 2 (29%)             |
|                        | Hoffa-synovitis score                                      | 1 (14%)         | 6 (86%)          | 0 (0%)              |
|                        | Effusion-synovitis score                                   | 0 (0%)          | 6 (86%)          | 1 (14%)             |
|                        | Meniscus morphology – medial body sub-region grading       | 0 (0%)          | 6 (86%)          | 1 (14%)             |
|                        | Meniscus morphology – maximum grade across all regions     | 0 (0%)          | 6 (86%)          | 1 (14%)             |
|                        | Meniscus morphology – patient group                        | 0 (0%)          | 6 (86%)          | 1 (14%)             |
| <b>PRG 6.7M</b>        | Maximum cartilage thickness score across treated knee      | 0 (0%)          | 7 (88%)          | 1 (13%)             |
|                        | Number of sub-regions with cartilage surface area score >0 | 0 (0%)          | 7 (88%)          | 1 (13%)             |
|                        | Maximum osteophyte score across treated knee               | 0 (0%)          | 7 (88%)          | 1 (13%)             |
|                        | Number of locations affected by osteophytes                | 0 (0%)          | 7 (88%)          | 1 (13%)             |
|                        | Maximum BML score in knee                                  | 1 (13%)         | 4 (50%)          | 3 (38%)             |
|                        | Number of sub-regions affected by BMLs                     | 1 (13%)         | 4 (50%)          | 3 (38%)             |
|                        | Hoffa-synovitis score                                      | 0 (0%)          | 7 (88%)          | 1 (13%)             |
|                        | Effusion-synovitis score                                   | 1 (13%)         | 7 (88%)          | 0 (0%)              |
|                        | Meniscus morphology – lateral anterior sub-region grading  | 0 (0%)          | 7 (88%)          | 1 (13%)             |

Data are presented as n (%).BML, bone marrow lesion.
